# Supplementary material for: Occurrence and transmission potential of asymptomatic and presymptomatic SARS-CoV-2 infections: A living systematic review and meta-analysis
Source: PubMed Central journal article supplement (PMC7508369; doi:10.1371/journal.pmed.1003346), 2020-09-22
Supplement: pmed.1003346.s003.pdf [file pmed.1003346.s003.pdf]

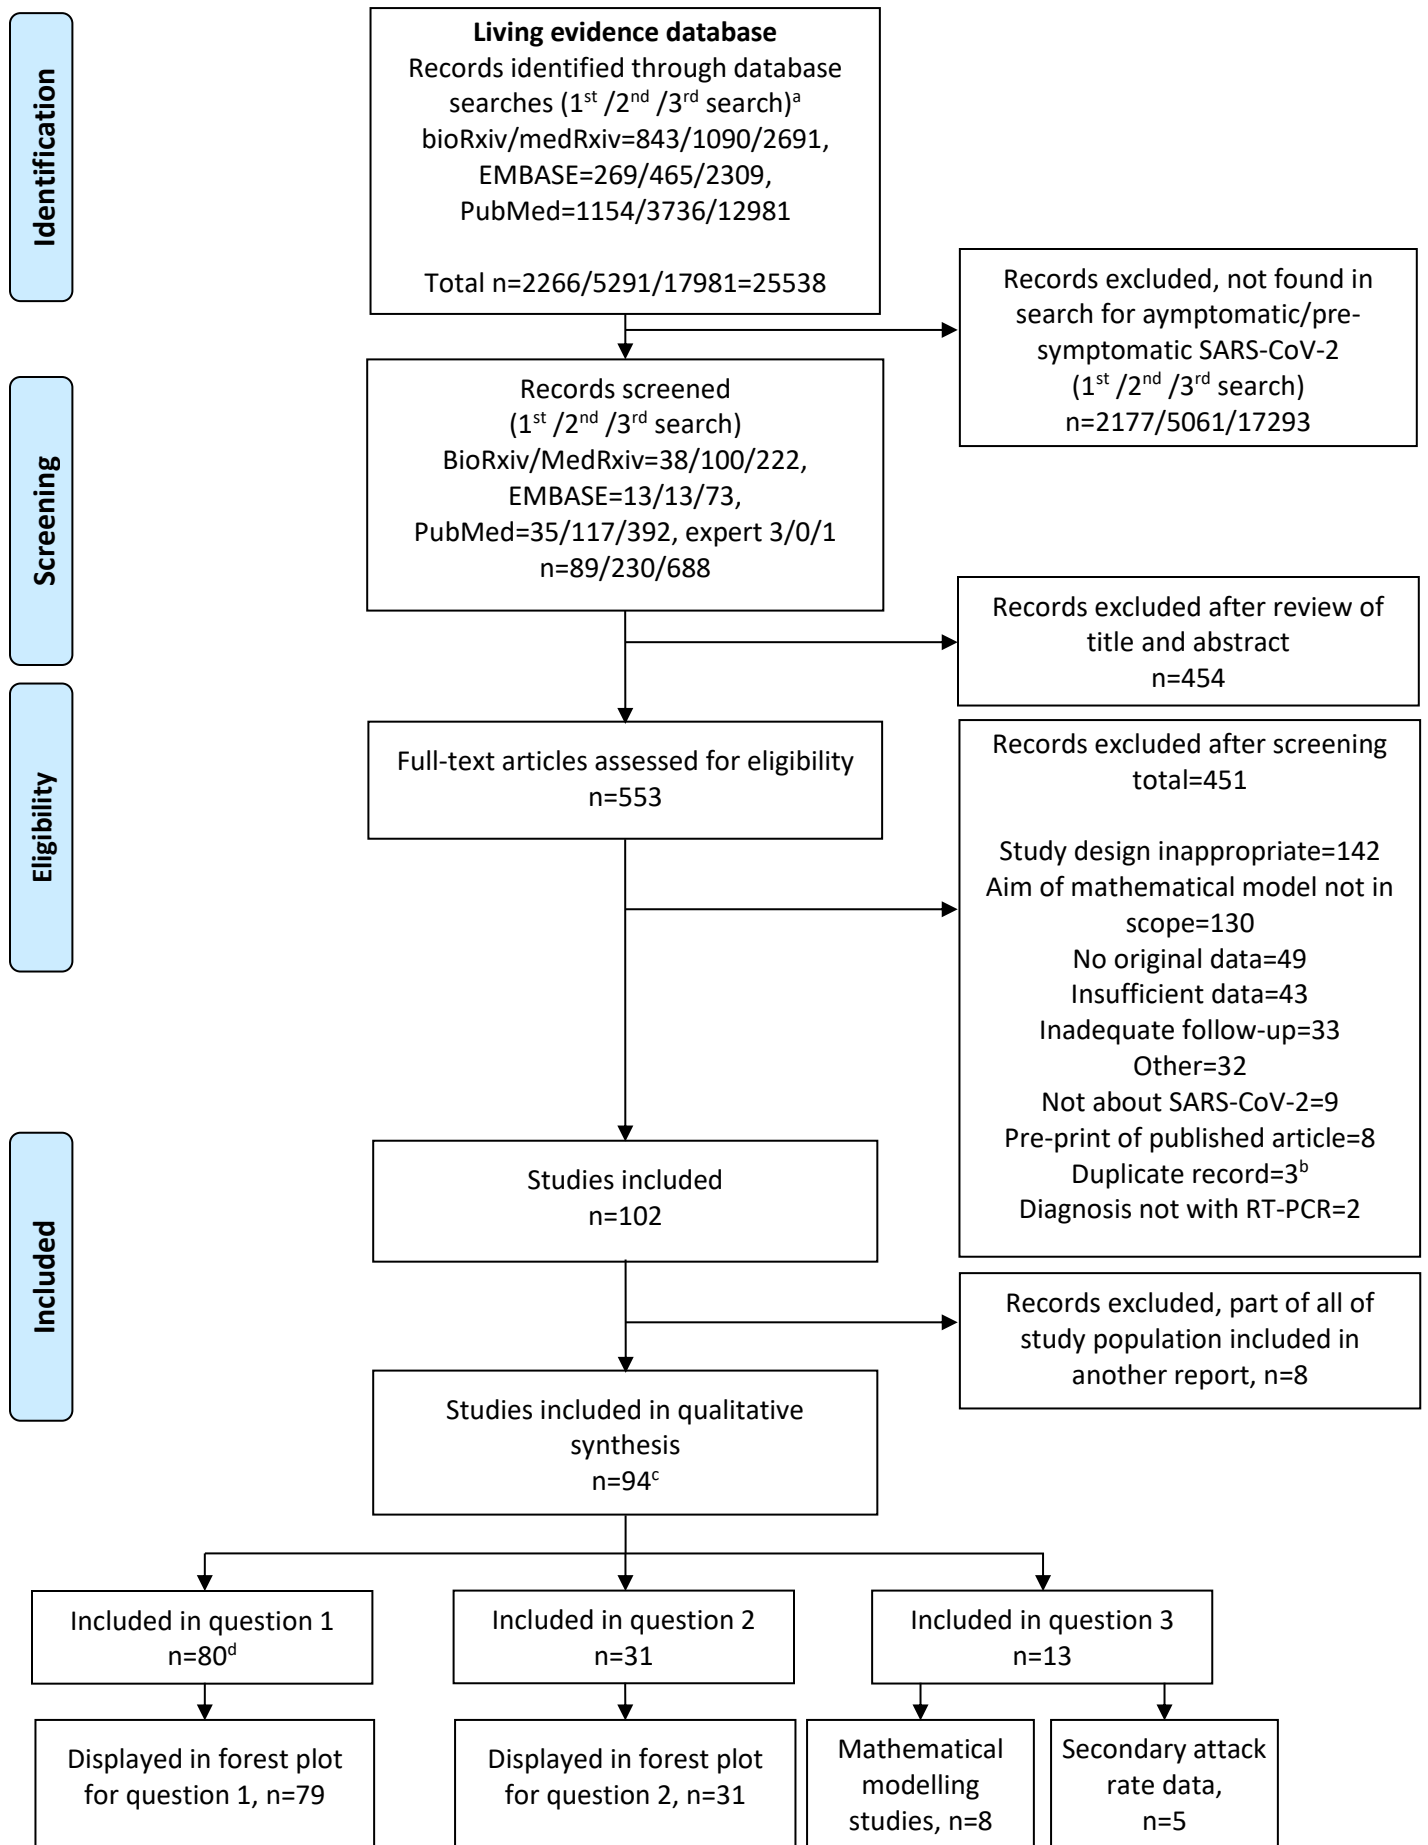

**Figure S1. Flow chart of identified, excluded and included records as of 10 June 2020**

<sup>a</sup> Numbers of new records at each search: 1<sup>st</sup> search, 25.03.2020; 2<sup>nd</sup> search, 20.04.2020; 3<sup>rd</sup> search, 10.06.2020

<sup>b</sup> Duplicate records are identical articles in different databases, found after automated de-duplication

<sup>c</sup> 11 studies were included in the first review and 37 studies were included in the first update

<sup>d</sup> Study by Mizumoto et al. in qualitative synthesis but not included in forest plot
