# Supplementary material for: Occurrence and transmission potential of asymptomatic and presymptomatic SARS-CoV-2 infections: A living systematic review and meta-analysis
Source: PubMed Central journal article supplement (PMC7508369; doi:10.1371/journal.pmed.1003346), 2020-09-22
Supplement: pmed.1003346.s004.pdf [file pmed.1003346.s004.pdf]

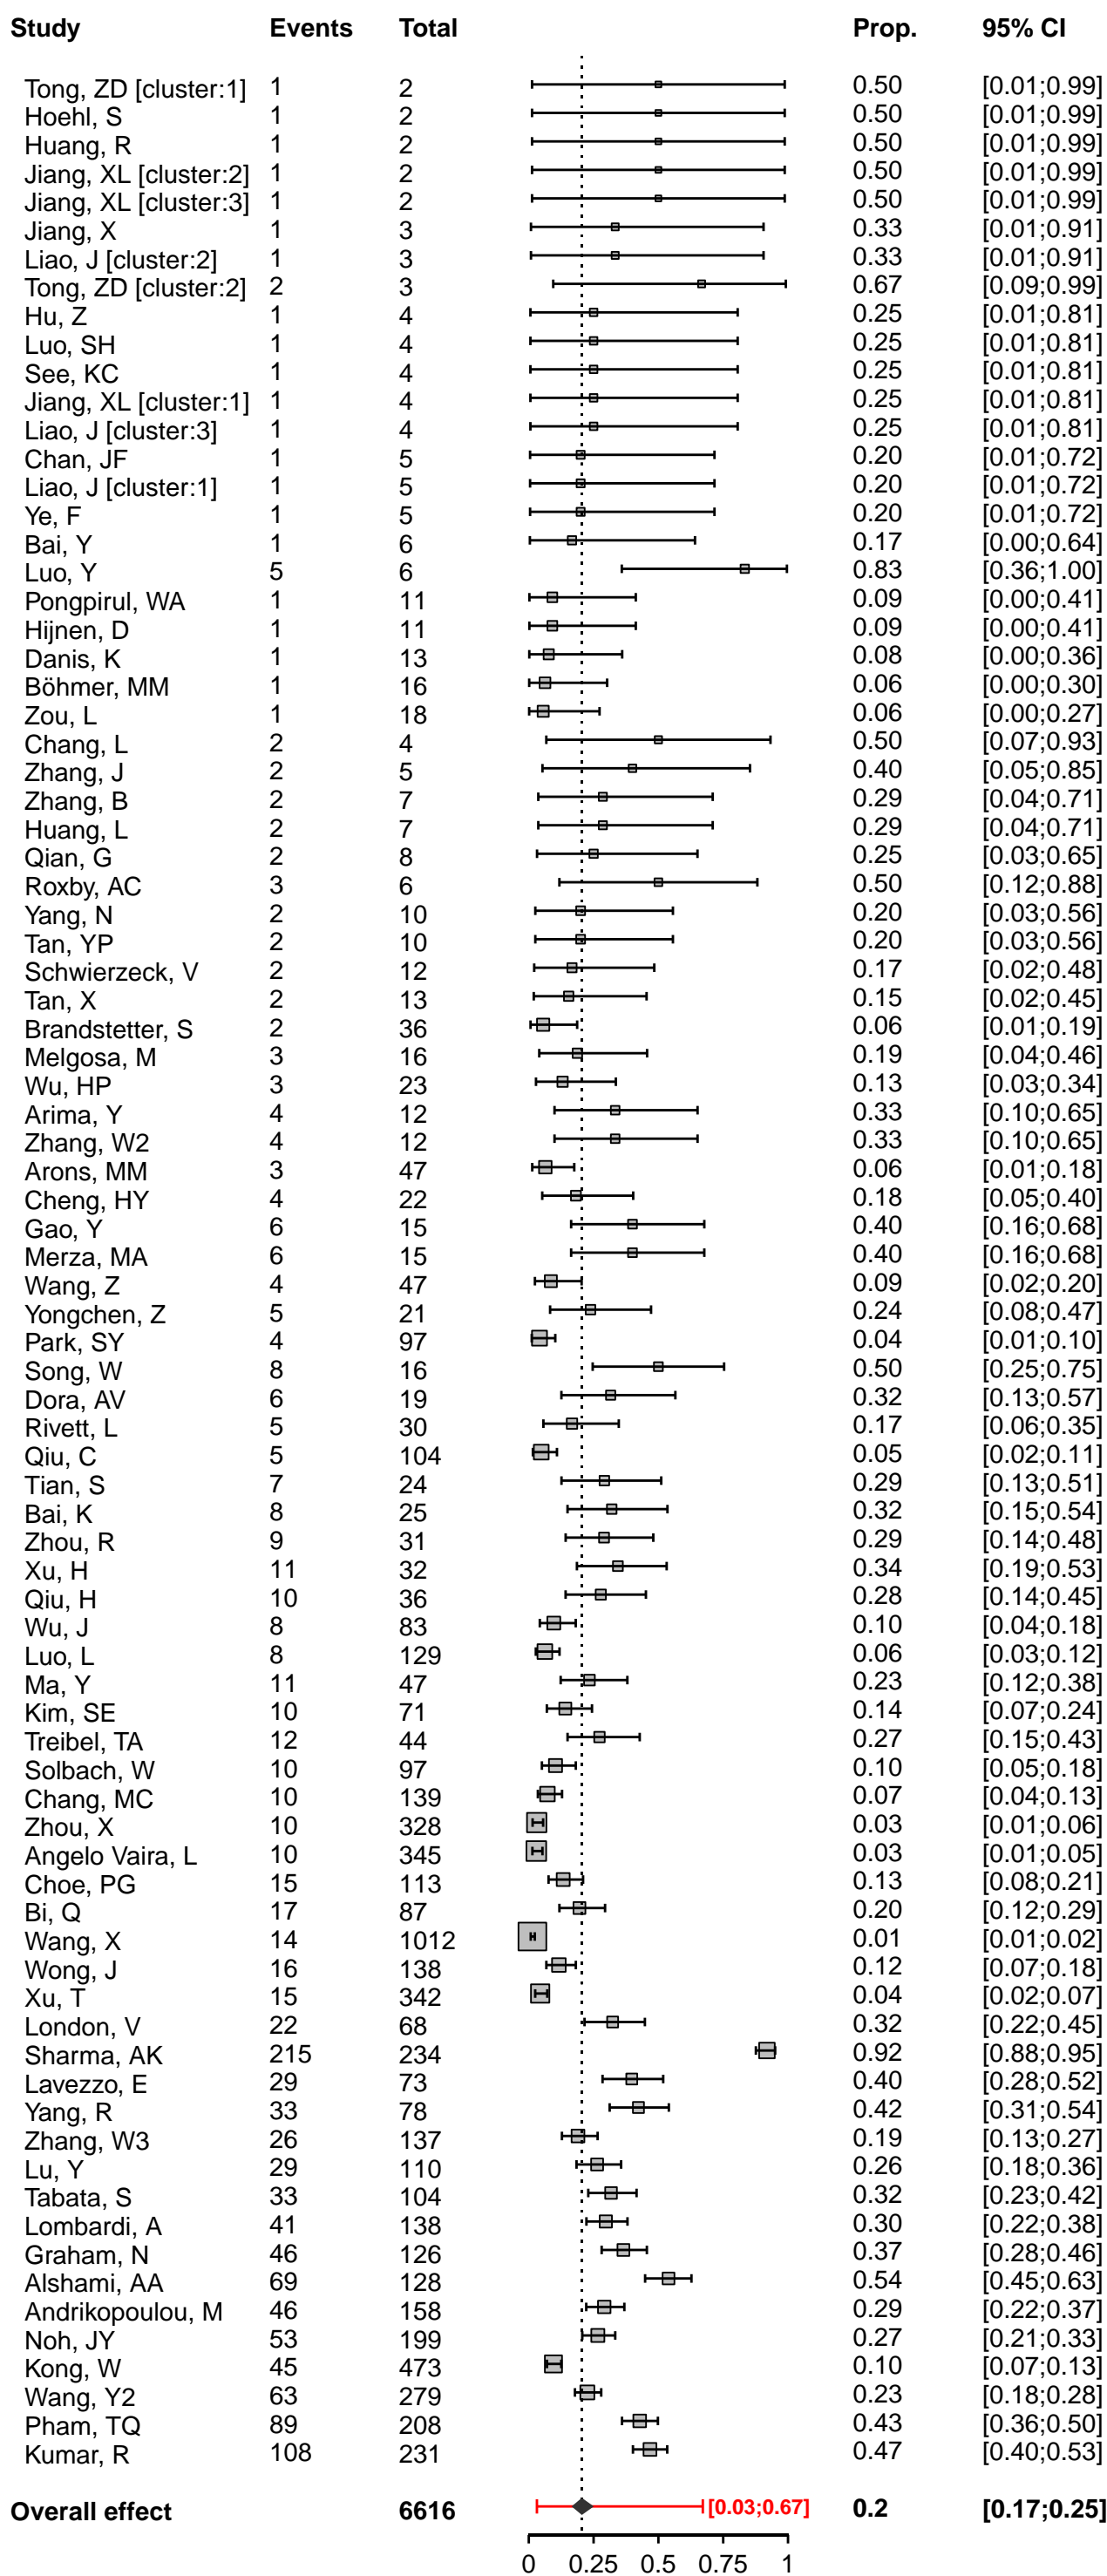

**S2 Figure. Review question 1, forest plot of included studies, by study precision**

The size of the shaded square is proportional to study size; solid diamond is the summary proportion and 95% confidence interval, estimated from random effects meta-analysis; red line is the prediction interval.
