# Supplementary material for: Occurrence and transmission potential of asymptomatic and presymptomatic SARS-CoV-2 infections: A living systematic review and meta-analysis
Source: PubMed Central journal article supplement (PMC7508369; doi:10.1371/journal.pmed.1003346), 2020-09-22
Supplement: pmed.1003346.s005.pdf [file pmed.1003346.s005.pdf]

S3 Figure. Risk of bias and reporting quality of observational studies assessing proportion of asymptomatic and pre-symptomatic SARS-CoV-2 infection [11,12]

| Author                                    | 1                            | 2                                     | 3                                         | 4                                     | 5                                  | 6                                             | 7                                            | 8a                                              | 8b                 | 9                                         | 10                                  | 11a                                                       | 11b                                                       | 12                                                                                               |
|-------------------------------------------|------------------------------|---------------------------------------|-------------------------------------------|---------------------------------------|------------------------------------|-----------------------------------------------|----------------------------------------------|-------------------------------------------------|--------------------|-------------------------------------------|-------------------------------------|-----------------------------------------------------------|-----------------------------------------------------------|--------------------------------------------------------------------------------------------------|
|                                           | Clear criteria for inclusion | RT-PCR diagnosis for all participants | Asymptomatic status at start of follow-up | Consecutive inclusion of participants | Complete inclusion of participants | Reporting of the demographics of participants | Reporting of clinical information (symptoms) | Symptom status of cases at the end of follow-up | Adequate follow-up | Reporting of the site/clinic demographics | Numerator and denominator available | Study population adequate sample of the source population | Study population adequate sample of the target population | The assessment of the secondary attack rate was adequate and similar in all groups (low risk of) |
| <b>Contact investigations</b>             |                              |                                       |                                           |                                       |                                    |                                               |                                              |                                                 |                    |                                           |                                     |                                                           |                                                           |                                                                                                  |
| Tong, ZD                                  | Yes                          | Yes                                   | Yes                                       | Yes                                   | Yes                                | Yes                                           | Yes                                          | Yes                                             | Yes                | Yes                                       | Yes                                 | Yes                                                       | No                                                        | NA                                                                                               |
| 735: Huang, R                             | Yes                          | Yes                                   | Yes                                       | Yes                                   | Yes                                | Yes                                           | Yes                                          | Yes                                             | Yes                | Yes                                       | Yes                                 | Yes                                                       | No                                                        | NA                                                                                               |
| 344: Jiang, XL                            | Yes                          | Yes                                   | Yes                                       | Yes                                   | Yes                                | Yes                                           | Yes                                          | Yes                                             | Yes                | Yes                                       | Yes                                 | Yes                                                       | No                                                        | NA                                                                                               |
| 372: Jiang, X                             | Yes                          | Yes                                   | Yes                                       | Yes                                   | Yes                                | Yes                                           | No                                           | Yes                                             | Yes                | Yes                                       | Yes                                 | Yes                                                       | No                                                        | NA                                                                                               |
| 36: Liao, J                               | Yes                          | Yes                                   | Yes                                       | Yes                                   | Yes                                | Yes                                           | Yes                                          | Yes                                             | Yes                | Yes                                       | Yes                                 | Yes                                                       | No                                                        | NA                                                                                               |
| 22: Hu, Z                                 | Yes                          | Yes                                   | Yes                                       | Yes                                   | Yes                                | Yes                                           | Yes                                          | Yes                                             | Yes                | Yes                                       | Yes                                 | Yes                                                       | No                                                        | NA                                                                                               |
| 42: Luo, SH                               | Yes                          | Yes                                   | Yes                                       | Yes                                   | No                                 | No                                            | Yes                                          | Yes                                             | Yes                | Yes                                       | Yes                                 | Yes                                                       | No                                                        | NA                                                                                               |
| 11: Chan, JF                              | Yes                          | Yes                                   | Yes                                       | Yes                                   | Yes                                | Yes                                           | Yes                                          | Yes                                             | Yes                | Yes                                       | Yes                                 | Yes                                                       | No                                                        | NA                                                                                               |
| 180: Ye, F                                | Yes                          | Yes                                   | Yes                                       | Yes                                   | Yes                                | Yes                                           | Yes                                          | Yes                                             | Yes                | Yes                                       | Yes                                 | Yes                                                       | No                                                        | NA                                                                                               |
| 4: Bai, Y                                 | Yes                          | Yes                                   | Yes                                       | Yes                                   | Yes                                | No                                            | Yes                                          | Yes                                             | Yes                | Yes                                       | Yes                                 | Yes                                                       | No                                                        | NA                                                                                               |
| 374: Luo: Y                               | Yes                          | Yes                                   | Yes                                       | Yes                                   | Yes                                | No                                            | Yes                                          | Yes                                             | Yes                | Yes                                       | Yes                                 | Yes                                                       | No                                                        | NA                                                                                               |
| 142: Zhang, J                             | Yes                          | Yes                                   | Yes                                       | Yes                                   | Yes                                | No                                            | Yes                                          | Yes                                             | Yes                | Yes                                       | Yes                                 | Yes                                                       | No                                                        | NA                                                                                               |
| 389: Zhang, B                             | Yes                          | Yes                                   | Yes                                       | Yes                                   | Yes                                | Yes                                           | Yes                                          | Yes                                             | Yes                | Yes                                       | Yes                                 | Yes                                                       | No                                                        | NA                                                                                               |
| 449: Huang, L                             | Yes                          | Yes                                   | Yes                                       | Yes                                   | Yes                                | Yes                                           | Yes                                          | Yes                                             | Yes                | Yes                                       | Yes                                 | Yes                                                       | No                                                        | NA                                                                                               |
| 54: Qian, G                               | Yes                          | Yes                                   | Yes                                       | Yes                                   | Yes                                | No                                            | Yes                                          | Yes                                             | Yes                | No                                        | Yes                                 | Yes                                                       | No                                                        | NA                                                                                               |
| 414: Gao, Y                               | Yes                          | Yes                                   | Yes                                       | Yes                                   | Yes                                | Yes                                           | No                                           | Yes                                             | Yes                | Yes                                       | Yes                                 | Yes                                                       | No                                                        | NA                                                                                               |
| 563: Chaw, L                              | Yes                          | Yes                                   | Yes                                       | Yes                                   | Yes                                | Yes                                           | Yes                                          | Yes                                             | Yes                | Yes                                       | Yes                                 | Yes                                                       | No                                                        | NA                                                                                               |
| <b>Contact investigations, aggregated</b> |                              |                                       |                                           |                                       |                                    |                                               |                                              |                                                 |                    |                                           |                                     |                                                           |                                                           |                                                                                                  |
| 599: Hijen, P                             | Yes                          | Yes                                   | Yes                                       | Yes                                   | No                                 | Yes                                           | Yes                                          | Yes                                             | Yes                | Yes                                       | Yes                                 | Yes                                                       | No                                                        | NA                                                                                               |
| 665: Brandstetter, S                      | Yes                          | Yes                                   | Yes                                       | Yes                                   | No                                 | No                                            | Yes                                          | Yes                                             | Yes                | Yes                                       | Yes                                 | Yes                                                       | No                                                        | NA                                                                                               |
| 821: Zhang, W2                            | Yes                          | Yes                                   | Yes                                       | Yes                                   | Yes                                | No                                            | No                                           | Yes                                             | Yes                | Yes                                       | Yes                                 | Yes                                                       | Yes                                                       | Yes                                                                                              |
| 477: Cheng, HY                            | Yes                          | Yes                                   | Yes                                       | Yes                                   | Yes                                | No                                            | No                                           | Yes                                             | Yes                | Yes                                       | Yes                                 | Yes                                                       | Yes                                                       | Yes                                                                                              |
| 249: Wang, Z                              | No                           | Yes                                   | Yes                                       | Unclear                               | No                                 | No                                            | Yes                                          | Unclear                                         | Unclear            | Yes                                       | Yes                                 | Unclear                                                   | No                                                        | NA                                                                                               |
| 597: Wu, J                                | Yes                          | Yes                                   | Yes                                       | Yes                                   | Yes                                | No                                            | Yes                                          | Yes                                             | Yes                | Yes                                       | Yes                                 | Yes                                                       | No                                                        | NA                                                                                               |
| 122: Luo, L                               | Yes                          | Yes                                   | Yes                                       | Yes                                   | Yes                                | Yes                                           | Yes                                          | Yes                                             | Yes                | Yes                                       | Yes                                 | Yes                                                       | Yes                                                       | Yes                                                                                              |
| 443: Bi, Q                                | Yes                          | Yes                                   | Yes                                       | Yes                                   | No                                 | No                                            | Yes                                          | Yes                                             | Yes                | Yes                                       | Yes                                 | Yes                                                       | Yes                                                       | NA                                                                                               |
| 908: Yang, R                              | Yes                          | Yes                                   | Yes                                       | Yes                                   | Yes                                | No                                            | No                                           | Yes                                             | Yes                | Yes                                       | Yes                                 | Yes                                                       | No                                                        | NA                                                                                               |
| <b>Outbreak investigations</b>            |                              |                                       |                                           |                                       |                                    |                                               |                                              |                                                 |                    |                                           |                                     |                                                           |                                                           |                                                                                                  |
| 242: Danis, K                             | Yes                          | Yes                                   | Yes                                       | Yes                                   | Yes                                | No                                            | Yes                                          | Yes                                             | Yes                | Yes                                       | Yes                                 | Yes                                                       | No                                                        | NA                                                                                               |
| 713: Böhmer, MM                           | Yes                          | Yes                                   | Yes                                       | Yes                                   | Yes                                | No                                            | Yes                                          | Yes                                             | Yes                | Yes                                       | Yes                                 | Yes                                                       | Unclear                                                   | NA                                                                                               |
| 763: Roxby, AC                            | Yes                          | Yes                                   | Yes                                       | Yes                                   | No                                 | No                                            | Yes                                          | Yes                                             | Yes                | Yes                                       | Yes                                 | Yes                                                       | No                                                        | NA                                                                                               |
| 152: Yang, N                              | Yes                          | Yes                                   | Yes                                       | Yes                                   | No                                 | Yes                                           | Yes                                          | Yes                                             | Yes                | Yes                                       | Yes                                 | No                                                        | No                                                        | NA                                                                                               |
| 396: Schwierzeck, V                       | Yes                          | Yes                                   | Yes                                       | Yes                                   | No                                 | No                                            | Yes                                          | Yes                                             | Yes                | Yes                                       | Yes                                 | Yes                                                       | No                                                        | NA                                                                                               |
| 376: Aroons, MM                           | Yes                          | Yes                                   | Yes                                       | Yes                                   | Yes                                | No                                            | No                                           | Yes                                             | Yes                | Yes                                       | Yes                                 | Yes                                                       | No                                                        | NA                                                                                               |
| 354: Park, SY                             | Yes                          | Yes                                   | Yes                                       | Yes                                   | Yes                                | No                                            | No                                           | Yes                                             | Yes                | Yes                                       | Yes                                 | Yes                                                       | Yes                                                       | Yes                                                                                              |
| 849: Dora, AV                             | Yes                          | Yes                                   | Yes                                       | Yes                                   | Yes                                | Yes                                           | Yes                                          | Yes                                             | Yes                | Yes                                       | Yes                                 | Yes                                                       | No                                                        | NA                                                                                               |
| 265: Tian, S                              | Yes                          | Yes                                   | Yes                                       | Yes                                   | Yes                                | Yes                                           | Yes                                          | Yes                                             | Yes                | Yes                                       | Yes                                 | Yes                                                       | Yes                                                       | NA                                                                                               |
| 899: Solbach, W                           | Yes                          | Yes                                   | Yes                                       | Yes                                   | No                                 | No                                            | No                                           | Yes                                             | Yes                | Yes                                       | Yes                                 | Yes                                                       | Yes                                                       | NA                                                                                               |
| 1003: Graham, N                           | Yes                          | Yes                                   | Yes                                       | Yes                                   | No                                 | Yes                                           | Yes                                          | Yes                                             | Yes                | Yes                                       | Yes                                 | Yes                                                       | No                                                        | NA                                                                                               |
| 696: Pham, TQ                             | Yes                          | Yes                                   | Yes                                       | Yes                                   | Yes                                | No                                            | No                                           | Yes                                             | Yes                | Yes                                       | Yes                                 | Yes                                                       | Yes                                                       | NA                                                                                               |
| <b>Screening</b>                          |                              |                                       |                                           |                                       |                                    |                                               |                                              |                                                 |                    |                                           |                                     |                                                           |                                                           |                                                                                                  |
| 317: Hoesli, S                            | Yes                          | Yes                                   | Yes                                       | Yes                                   | Yes                                | No                                            | No                                           | Yes                                             | Yes                | Yes                                       | Yes                                 | Yes                                                       | No                                                        | NA                                                                                               |
| 170: Chang, L                             | Yes                          | Yes                                   | Yes                                       | Yes                                   | Yes                                | No                                            | No                                           | Yes                                             | Yes                | No                                        | Yes                                 | Yes                                                       | No                                                        | NA                                                                                               |
| 224: Arima, Y                             | Yes                          | Yes                                   | Yes                                       | Yes                                   | Yes                                | No                                            | No                                           | Yes                                             | Yes                | Yes                                       | Yes                                 | No                                                        | No                                                        | NA                                                                                               |
| 598: Rivett, L                            | Yes                          | Yes                                   | Yes                                       | Yes                                   | Yes                                | No                                            | No                                           | Yes                                             | Yes                | Yes                                       | Yes                                 | Yes                                                       | No                                                        | NA                                                                                               |
| 622: Treibel, TA                          | Yes                          | Yes                                   | Yes                                       | Yes                                   | No                                 | No                                            | No                                           | Yes                                             | Yes                | No                                        | Yes                                 | Unclear                                                   | No                                                        | NA                                                                                               |
| 294: Lavezzo, E                           | Unclear                      | Yes                                   | Yes                                       | Unclear                               | No                                 | No                                            | No                                           | Yes                                             | Yes                | Yes                                       | Yes                                 | Yes                                                       | Unclear                                                   | NA                                                                                               |
| 593: Lombardi, A                          | Yes                          | Yes                                   | Yes                                       | Yes                                   | Yes                                | No                                            | Yes                                          | Yes                                             | Yes                | Yes                                       | Yes                                 | Yes                                                       | No                                                        | NA                                                                                               |
| 278: Lytras, T                            | Yes                          | Yes                                   | No                                        | Yes                                   | Yes                                | No                                            | Yes                                          | Yes                                             | Yes                | Yes                                       | Yes                                 | Yes                                                       | No                                                        | NA                                                                                               |
| <b>Hospitalised adults</b>                |                              |                                       |                                           |                                       |                                    |                                               |                                              |                                                 |                    |                                           |                                     |                                                           |                                                           |                                                                                                  |
| 204: Pongpirul, WA                        | Yes                          | Yes                                   | Yes                                       | Yes                                   | Yes                                | Yes                                           | Yes                                          | Yes                                             | Yes                | Yes                                       | Yes                                 | Yes                                                       | No                                                        | NA                                                                                               |
| 216: Zou, L                               | Yes                          | Yes                                   | Yes                                       | Yes                                   | Unclear                            | Yes                                           | Yes                                          | Yes                                             | Yes                | Yes                                       | Yes                                 | Unclear                                                   | No                                                        | NA                                                                                               |
| 521: Qiu, C                               | Yes                          | Yes                                   | Yes                                       | Yes                                   | Yes                                | Yes                                           | Yes                                          | Yes                                             | Yes                | Yes                                       | Yes                                 | Yes                                                       | No                                                        | NA                                                                                               |
| 761: Zhou, R                              | Yes                          | Yes                                   | Yes                                       | Yes                                   | Yes                                | No                                            | No                                           | Yes                                             | Yes                | Yes                                       | Yes                                 | Unclear                                                   | No                                                        | NA                                                                                               |
| 664: Chang, MC                            | Yes                          | Yes                                   | Yes                                       | Yes                                   | Yes                                | Yes                                           | No                                           | Yes                                             | Yes                | Yes                                       | Yes                                 | Yes                                                       | No                                                        | NA                                                                                               |
| 233: Zhou, X                              | Yes                          | Yes                                   | Yes                                       | Yes                                   | Yes                                | Yes                                           | Yes                                          | Yes                                             | Yes                | Yes                                       | Yes                                 | Yes                                                       | No                                                        | NA                                                                                               |
| 765: Angelo Vaira, L                      | Yes                          | Unclear                               | Yes                                       | Yes                                   | Yes                                | No                                            | Yes                                          | Yes                                             | Yes                | Yes                                       | Yes                                 | Yes                                                       | No                                                        | NA                                                                                               |
| 187: Wang, X                              | Yes                          | Yes                                   | Yes                                       | Yes                                   | Yes                                | Yes                                           | Yes                                          | Yes                                             | Yes                | Yes                                       | Yes                                 | Yes                                                       | No                                                        | NA                                                                                               |
| 506: Wong, J                              | Yes                          | Yes                                   | Yes                                       | Yes                                   | Yes                                | No                                            | No                                           | Yes                                             | Yes                | No                                        | Yes                                 | Yes                                                       | No                                                        | NA                                                                                               |
| 434: Xu, T                                | Yes                          | Yes                                   | Yes                                       | Yes                                   | Yes                                | Yes                                           | Yes                                          | Yes                                             | Yes                | Yes                                       | Yes                                 | Yes                                                       | No                                                        | NA                                                                                               |
| 729: London, V                            | Yes                          | Yes                                   | Yes                                       | Yes                                   | Unclear                            | No                                            | Yes                                          | Yes                                             | Yes                | Yes                                       | Yes                                 | Yes                                                       | No                                                        | NA                                                                                               |
| 164: Tabata, S                            | Yes                          | Yes                                   | Yes                                       | Yes                                   | Yes                                | Yes                                           | Yes                                          | No                                              | Yes                | Yes                                       | No                                  | Yes                                                       | No                                                        | NA                                                                                               |
| 832: Andrikopoulou, M                     | Yes                          | Yes                                   | Yes                                       | Yes                                   | Yes                                | No                                            | Yes                                          | Yes                                             | Yes                | Yes                                       | Yes                                 | Yes                                                       | No                                                        | NA                                                                                               |
| 797: Noh, JY                              | Unclear                      | Yes                                   | Yes                                       | Unclear                               | Unclear                            | No                                            | Yes                                          | Yes                                             | Yes                | Yes                                       | Yes                                 | Yes                                                       | Unclear                                                   | NA                                                                                               |
| 818: Kumar, R                             | Yes                          | Yes                                   | Yes                                       | Yes                                   | No                                 | Yes                                           | Yes                                          | Yes                                             | Yes                | Yes                                       | Yes                                 | Yes                                                       | No                                                        | NA                                                                                               |
| 267: Meng, H                              | Yes                          | Yes                                   | Yes                                       | Yes                                   | Unclear                            | Yes                                           | Yes                                          | Yes                                             | Yes                | Yes                                       | Yes                                 | Yes                                                       | No                                                        | NA                                                                                               |
| 491: Zhang, Z                             | Yes                          | Yes                                   | Yes                                       | Yes                                   | No                                 | No                                            | Yes                                          | Yes                                             | Yes                | Yes                                       | Yes                                 | Yes                                                       | No                                                        | NA                                                                                               |
| 834: Al-Shamsi, HO                        | Yes                          | Yes                                   | Yes                                       | Yes                                   | Yes                                | Yes                                           | No                                           | Yes                                             | Yes                | Yes                                       | Yes                                 | Yes                                                       | No                                                        | NA                                                                                               |
| 71: Wang, Y1                              | Yes                          | Yes                                   | Yes                                       | Yes                                   | Yes                                | Yes                                           | No                                           | No                                              | Yes                | Yes                                       | Yes                                 | Yes                                                       | No                                                        | NA                                                                                               |
| <b>Hospitalised children</b>              |                              |                                       |                                           |                                       |                                    |                                               |                                              |                                                 |                    |                                           |                                     |                                                           |                                                           |                                                                                                  |
| 299: See, KC                              | Yes                          | Yes                                   | Yes                                       | Yes                                   | Yes                                | Yes                                           | Yes                                          | Yes                                             | Yes                | Yes                                       | Yes                                 | Unclear                                                   | No                                                        | NA                                                                                               |
| 275: Tan, YP                              | Yes                          | Yes                                   | Yes                                       | Yes                                   | Yes                                | Yes                                           | Yes                                          | Yes                                             | Yes                | Yes                                       | Yes                                 | Yes                                                       | No                                                        | NA                                                                                               |
| 334: Tan, X                               | Yes                          | Yes                                   | Yes                                       | Yes                                   | Yes                                | Yes                                           | Yes                                          | Yes                                             | Yes                | Yes                                       | Yes                                 | Yes                                                       | No                                                        | NA                                                                                               |
| 769: Melgosa, M                           | Yes                          | Yes                                   | Yes                                       | Yes                                   | Yes                                | No                                            | Yes                                          | Yes                                             | Yes                | Yes                                       | Yes                                 | Yes                                                       | No                                                        | NA                                                                                               |
| 843: Wu, HP                               | Yes                          | Yes                                   | Yes                                       | Yes                                   | Yes                                | No                                            | Yes                                          | Yes                                             | Yes                | Yes                                       | Yes                                 | Yes                                                       | No                                                        | NA                                                                                               |
| 481: Song, W                              | Yes                          | Yes                                   | Yes                                       | Yes                                   | Unclear                            | Yes                                           | Yes                                          | Yes                                             | Yes                | Yes                                       | Yes                                 | Yes                                                       | No                                                        | NA                                                                                               |
| 653: Bai, K                               | Yes                          | Yes                                   | Yes                                       | Yes                                   | No                                 | Yes                                           | Yes                                          | Yes                                             | Yes                | Yes                                       | Yes                                 | Yes                                                       | No                                                        | NA                                                                                               |
| 382: Xu, H                                | Yes                          | Yes                                   | Yes                                       | Yes                                   | Unclear                            | Yes                                           | Yes                                          | Yes                                             | Yes                | Unclear                                   | Yes                                 | Yes                                                       | No                                                        | NA                                                                                               |
| 141: Qiu, H                               | Yes                          | Yes                                   | Yes                                       | Yes                                   | Yes                                | Yes                                           | Yes                                          | Unclear                                         | Unclear            | Yes                                       | Yes                                 | Yes                                                       | No                                                        | NA                                                                                               |
| 556: Lu, Y                                | Yes                          | Yes                                   | Yes                                       | Yes                                   | Unclear                            | Yes                                           | Yes                                          | Yes                                             | Yes                | Yes                                       | Yes                                 | Yes                                                       | No                                                        | NA                                                                                               |
| <b>Hospitalised adults and children</b>   |                              |                                       |                                           |                                       |                                    |                                               |                                              |                                                 |                    |                                           |                                     |                                                           |                                                           |                                                                                                  |
| 637: Merza, MA                            | Yes                          | Yes                                   | Yes                                       | Yes                                   | Yes                                | Yes                                           | Yes                                          | Yes                                             | Yes                | Yes                                       | Yes                                 | Yes                                                       | No                                                        | NA                                                                                               |
| 328: Yongchen, Z                          | Yes                          | Yes                                   | Yes                                       | Yes                                   | Yes                                | No                                            | Yes                                          | Yes                                             | Yes                | Yes                                       | Yes                                 | Yes                                                       | No                                                        | NA                                                                                               |
| 585: Ma, Y                                | Yes                          | Yes                                   | Yes                                       | Yes                                   | Yes                                | Yes                                           | Yes                                          | Yes                                             | Yes                | Yes                                       | Yes                                 | Yes                                                       | No                                                        | NA                                                                                               |
| 559: Kim, SE                              | Yes                          | Yes                                   | Yes                                       | Yes                                   | Yes                                | Yes                                           | Yes                                          | Yes                                             | Yes                | Yes                                       | Yes                                 | Yes                                                       | Unclear                                                   | NA                                                                                               |
| 856: Choe, PG                             | Yes                          | Yes                                   | Yes                                       | Yes                                   | No                                 | No                                            | Yes                                          | Yes                                             | Yes                | Yes                                       | Yes                                 | No                                                        | No                                                        | NA                                                                                               |
| 981: Sharma, AK                           | Yes                          | Yes                                   | Yes                                       | Yes                                   | Yes                                | No                                            | No                                           | Yes                                             | Yes                | Yes                                       | Yes                                 | Yes                                                       | No                                                        | NA                                                                                               |
| 745: Zhang, W3                            | Unclear                      | Yes                                   | Yes                                       | Yes                                   | No                                 | No                                            | Yes                                          | Yes                                             | Yes                | Yes                                       | Yes                                 | Unclear                                                   | No                                                        | NA                                                                                               |
| 726: Alshami, AA                          | Yes                          | Yes                                   | Yes                                       | Yes                                   | No                                 | No                                            | Yes                                          | Yes                                             | Yes                | Yes                                       | Yes                                 | Yes                                                       | Unclear                                                   | NA                                                                                               |
| 936: Kong, W                              | Yes                          | Yes                                   | Yes                                       | Yes                                   | No                                 | Yes                                           | Yes                                          | Yes                                             | Yes                | Yes                                       | Yes                                 | Yes                                                       | No                                                        | NA                                                                                               |
| 778: Wang, Y2                             | Yes                          | Yes                                   | Yes                                       | Yes                                   | Yes                                | Yes                                           | Unclear                                      | Yes                                             | Yes                | Yes                                       | Yes                                 | Yes                                                       | No                                                        | NA                                                                                               |

Adapted from two published assessment tools, citations refer to reference list in main text.  
 11. Joanna Briggs Institute checklist for case series, questions 1 to 10 (<http://joannabriggs.org/research/critical-appraisal-tools.html>)  
 12. Boyle MH. Guidelines for evaluating prevalence studies. Evidence Based Men Health 1998;1:37-40, questions 11a and 11b  
 Question 12 added by authors to assess risk of selection bias for participants in studies reporting secondary attack rate
