# Supplementary material for: Occurrence and transmission potential of asymptomatic and presymptomatic SARS-CoV-2 infections: A living systematic review and meta-analysis
Source: PubMed Central journal article supplement (PMC7508369; doi:10.1371/journal.pmed.1003346), 2020-09-22
Supplement: pmed.1003346.s009.pdf [file pmed.1003346.s009.pdf]

**S7 Figure. Relevance and credibility of mathematical modelling studies assessing contribution of asymptomatic and pre-symptomatic infection to SARS-CoV-2 transmission**

| Author      | 1<br>Is the population relevant? | 2<br>Are any critical interventions missing? | 3<br>Is the context (settings and circumstances) applicable? | 4<br>Is external validation of the model sufficient to make its results credible for your decision? | 5<br>Is internal verification of the model sufficient to make its results credible for your decision? | 6<br>Does the model have sufficient face validity to make its results credible for your decision? | 7<br>Is the design of the model adequate for your decision problem? | 8<br>Are the data used in populating the model suitable for your decision problem? | 9<br>Were the analyses performed using the model adequate to inform your decision problem? | 10<br>Was there an adequate assessment of the effects of uncertainty? | 11<br>Was the reporting of the model adequate to inform your decision problem? | 12<br>Was the interpretation of results fair and balanced? | 13<br>Were there any potential conflicts of interest? |
|-------------|----------------------------------|----------------------------------------------|--------------------------------------------------------------|-----------------------------------------------------------------------------------------------------|-------------------------------------------------------------------------------------------------------|---------------------------------------------------------------------------------------------------|---------------------------------------------------------------------|------------------------------------------------------------------------------------|--------------------------------------------------------------------------------------------|-----------------------------------------------------------------------|--------------------------------------------------------------------------------|------------------------------------------------------------|-------------------------------------------------------|
| Ferretti, L | Partial                          | NA                                           | Yes                                                          | No                                                                                                  | Yes                                                                                                   | Yes                                                                                               | Yes                                                                 | Partial                                                                            | Yes                                                                                        | Yes                                                                   | Yes                                                                            | No                                                         | No                                                    |
| Ganyani, T  | Partial                          | NA                                           | Yes                                                          | No                                                                                                  | Yes                                                                                                   | Yes                                                                                               | Yes                                                                 | Partial                                                                            | Yes                                                                                        | Partial                                                               | Yes                                                                            | Partial                                                    | No                                                    |
| Zhang, W    | Partial                          | NA                                           | Yes                                                          | No                                                                                                  | Yes                                                                                                   | No                                                                                                | Partial                                                             | Partial                                                                            | No                                                                                         | No                                                                    | No                                                                             | No                                                         | Unclear                                               |
| He, X       | Partial                          | NA                                           | Yes                                                          | No                                                                                                  | Yes                                                                                                   | Yes                                                                                               | Yes                                                                 | Partial                                                                            | Yes                                                                                        | Yes                                                                   | Partial                                                                        | Yes                                                        | No                                                    |
| Emery, JC   | Partial                          | NA                                           | Yes                                                          | Partial                                                                                             | Yes                                                                                                   | Yes                                                                                               | Partial                                                             | Partial                                                                            | Yes                                                                                        | Yes                                                                   | Yes                                                                            | Yes                                                        | No                                                    |
| Casey, M    | Yes                              | NA                                           | Yes                                                          | Partial                                                                                             | Yes                                                                                                   | Partial                                                                                           | Yes                                                                 | Yes                                                                                | Partial                                                                                    | Yes                                                                   | Yes                                                                            | Yes                                                        | No                                                    |
| Kim, Y      | Partial                          | NA                                           | Yes                                                          | No                                                                                                  | Yes                                                                                                   | Yes                                                                                               | Yes                                                                 | Partial                                                                            | Yes                                                                                        | Yes                                                                   | Yes                                                                            | Partial                                                    | No                                                    |
| Peak, CM    | Yes                              | NA                                           | Partial                                                      | No                                                                                                  | Yes                                                                                                   | Partial                                                                                           | Yes                                                                 | No                                                                                 | Partial                                                                                    | Partial                                                               | Partial                                                                        | Yes                                                        | No                                                    |

Checklist from ref 13. Jaime Caro J, et al. Value Health 2014;17:174-82.

Partial: item is partially addressed

NA: Not applicable
